# Supplementary material for: Litchi-Derived Polyphenol Alleviates Liver Steatosis and Gut Dysbiosis in Patients with Non-Alcoholic Fatty Liver Disease: A Randomized Double-Blinded, Placebo-Controlled Study
Source: MDPI journal article supplement (doi:10.3390/nu14142921), 2022-07-16
Supplement: s1 [file s1]

**Table S1** Lifestyle modification of the participants

| Physical activity          | Group      |            | Total      | <i>p</i> -Value |
|----------------------------|------------|------------|------------|-----------------|
|                            | Oligonol   | Placebo    |            |                 |
| less than once per week    | 8 (44.4%)  | 4 (22.2%)  | 12 (33.3%) | 0.329           |
| 1-2 times per week         | 8 (44.4%)  | 10 (55.6%) | 18 (50%)   |                 |
| more than 3 times per week | 2 (11.1%)  | 4 (22.2%)  | 6 (16.7%)  |                 |
| Total                      | 18 (100%)  | 18 (100%)  | 18 (100%)  |                 |
| Diet control               | Group      |            | Total      | <i>p</i> -Value |
|                            | Oligonol   | Placebo    |            |                 |
| Non                        | 10 (55.6%) | 2 (11.1%)  | 12 (33.3%) | 0.018*          |
| less than 50%              | 5 (27.8%)  | 11 (61.1%) | 16 (44.4%) |                 |
| more than 50%              | 3 (16.7%)  | 5 (27.8%)  | 8 (22.2%)  |                 |
| Total                      | 18 (100%)  | 18 (100%)  | 18 (100%)  |                 |

Data as shown as n (%); \*  $p < 0.05$

**Table S2** Read summary

| Code | Group        | input  | filtered | denoisedF | denoisedR | merged | nonchim |
|------|--------------|--------|----------|-----------|-----------|--------|---------|
| H12  | Healthy      | 45,420 | 39,364   | 38,814    | 39,197    | 38,384 | 38,030  |
| H16  | Healthy      | 26,423 | 22,950   | 22,750    | 22,797    | 22,458 | 22,264  |
| H20  | Healthy      | 35,686 | 30,801   | 30,520    | 30,597    | 30,082 | 29,452  |
| H22  | Healthy      | 43,077 | 38,144   | 37,963    | 38,029    | 37,674 | 37,074  |
| H24  | Healthy      | 11,152 | 9,205    | 9,146     | 9,158     | 9,077  | 9,077   |
| H26  | Healthy      | 23,922 | 20,212   | 19,936    | 19,984    | 19,542 | 19,493  |
| H29  | Healthy      | 68,397 | 59,110   | 58,109    | 58,614    | 56,554 | 52,729  |
| H30  | Healthy      | 43,975 | 37,572   | 36,562    | 37,126    | 35,370 | 32,529  |
| H1   | Healthy      | 31,218 | 26,621   | 26,354    | 26,398    | 25,963 | 25,882  |
| H2   | Healthy      | 27,419 | 23,909   | 23,626    | 23,739    | 23,287 | 23,263  |
| H3   | Healthy      | 26,469 | 23,318   | 23,076    | 23,186    | 22,909 | 22,876  |
| H4   | Healthy      | 38,937 | 34,034   | 33,799    | 33,914    | 33,463 | 32,993  |
| H7   | Healthy      | 44,557 | 36,014   | 35,588    | 35,793    | 35,072 | 34,699  |
| H8   | Healthy      | 42,792 | 36,943   | 36,527    | 36,743    | 35,738 | 34,882  |
| H11  | Healthy      | 49,569 | 40,177   | 39,398    | 39,788    | 38,230 | 35,361  |
| T1   | Oligonol_wk0 | 50,489 | 44,808   | 36,792    | 42,641    | 30,874 | 27,282  |
| T27  | Oligonol_wk0 | 50,840 | 44,673   | 39,075    | 42,891    | 28,339 | 20,829  |
| T39  | Oligonol_wk0 | 53,264 | 45,182   | 37,985    | 43,791    | 29,388 | 20,269  |
| T28  | Oligonol_wk0 | 50,437 | 44,309   | 38,570    | 42,542    | 29,159 | 21,261  |
| T40  | Oligonol_wk0 | 50,743 | 44,468   | 37,744    | 42,669    | 26,976 | 21,770  |
| T17  | Oligonol_wk0 | 56,134 | 49,260   | 40,026    | 46,326    | 31,230 | 25,873  |
| T29  | Oligonol_wk0 | 50,425 | 44,340   | 38,735    | 42,668    | 30,279 | 26,346  |
| T19  | Oligonol_wk0 | 43,756 | 38,102   | 32,704    | 36,605    | 24,000 | 20,386  |
| T6   | Oligonol_wk0 | 55,074 | 48,128   | 42,604    | 46,220    | 31,418 | 24,206  |
| T21  | Oligonol_wk0 | 50,803 | 44,571   | 39,183    | 42,030    | 28,692 | 23,391  |
| T33  | Oligonol_wk0 | 55,022 | 47,871   | 39,433    | 45,581    | 30,826 | 21,989  |
| T22  | Oligonol_wk0 | 54,159 | 46,026   | 39,376    | 44,313    | 29,400 | 22,692  |

|      |               |        |        |        |        |        |        |
|------|---------------|--------|--------|--------|--------|--------|--------|
| T9   | Oligonol_wk0  | 52,878 | 45,778 | 39,420 | 44,494 | 29,236 | 21,096 |
| T11  | Oligonol_wk0  | 51,699 | 45,322 | 34,399 | 42,609 | 25,915 | 19,798 |
| T24  | Oligonol_wk0  | 46,172 | 40,919 | 33,126 | 40,210 | 29,386 | 27,424 |
| T36  | Oligonol_wk0  | 51,078 | 44,822 | 39,640 | 43,198 | 31,396 | 27,528 |
| T13  | Oligonol_wk0  | 49,807 | 44,195 | 35,900 | 42,618 | 26,400 | 18,064 |
| T37  | Oligonol_wk0  | 51,597 | 45,077 | 37,792 | 43,752 | 29,101 | 21,983 |
| T14  | Oligonol_wk0  | 48,437 | 42,366 | 35,241 | 38,745 | 27,639 | 21,470 |
| TA1  | Oligonol_wk24 | 42,460 | 35,799 | 27,655 | 33,450 | 19,460 | 18,255 |
| TA27 | Oligonol_wk24 | 46,982 | 39,069 | 30,522 | 36,300 | 19,035 | 16,616 |
| TA39 | Oligonol_wk24 | 49,148 | 38,534 | 32,609 | 36,527 | 18,411 | 13,244 |
| TA28 | Oligonol_wk24 | 51,059 | 42,092 | 34,368 | 37,351 | 19,055 | 13,661 |
| TA40 | Oligonol_wk24 | 46,830 | 38,203 | 31,198 | 36,283 | 21,375 | 20,141 |
| TA17 | Oligonol_wk24 | 50,410 | 40,663 | 32,093 | 37,994 | 19,298 | 16,709 |
| TA29 | Oligonol_wk24 | 53,346 | 42,973 | 32,630 | 38,141 | 19,281 | 16,645 |
| TA19 | Oligonol_wk24 | 45,535 | 36,121 | 29,442 | 34,499 | 17,161 | 14,744 |
| TA6  | Oligonol_wk24 | 53,354 | 43,350 | 34,307 | 39,905 | 21,841 | 16,872 |
| TA21 | Oligonol_wk24 | 48,082 | 37,711 | 28,817 | 36,148 | 17,487 | 14,793 |
| TA33 | Oligonol_wk24 | 49,517 | 40,455 | 30,269 | 36,077 | 18,425 | 15,870 |
| TA22 | Oligonol_wk24 | 44,781 | 35,080 | 27,690 | 33,813 | 19,361 | 19,184 |
| TA9  | Oligonol_wk24 | 55,618 | 44,438 | 37,570 | 42,096 | 21,811 | 17,772 |
| TA11 | Oligonol_wk24 | 55,915 | 45,969 | 34,885 | 42,528 | 22,421 | 18,494 |
| TA24 | Oligonol_wk24 | 54,054 | 43,904 | 34,378 | 41,291 | 21,708 | 18,343 |
| TA36 | Oligonol_wk24 | 51,776 | 42,110 | 33,311 | 39,445 | 19,614 | 17,700 |
| TA13 | Oligonol_wk24 | 83,548 | 68,439 | 53,398 | 62,285 | 30,106 | 18,434 |
| TA37 | Oligonol_wk24 | 49,191 | 40,626 | 32,662 | 38,105 | 21,465 | 19,855 |
| TA14 | Oligonol_wk24 | 81,171 | 66,076 | 50,173 | 60,106 | 32,188 | 25,049 |
| T15  | Placebo_wk0   | 47,815 | 42,576 | 37,721 | 41,671 | 30,937 | 25,306 |
| T2   | Placebo_wk0   | 53,329 | 46,808 | 39,295 | 44,104 | 31,462 | 26,410 |
| T16  | Placebo_wk0   | 52,140 | 46,030 | 40,264 | 44,729 | 33,323 | 30,500 |
| T3   | Placebo_wk0   | 52,325 | 45,409 | 41,183 | 44,201 | 32,104 | 25,592 |
| T4   | Placebo_wk0   | 53,422 | 47,184 | 39,816 | 44,552 | 29,944 | 22,479 |
| T18  | Placebo_wk0   | 49,985 | 43,894 | 36,401 | 42,867 | 28,266 | 22,750 |
| T30  | Placebo_wk0   | 53,988 | 47,265 | 39,937 | 46,073 | 32,636 | 23,456 |
| T5   | Placebo_wk0   | 53,413 | 45,916 | 38,252 | 43,487 | 26,786 | 21,916 |
| T31  | Placebo_wk0   | 49,598 | 43,799 | 36,062 | 41,423 | 27,779 | 22,368 |
| T20  | Placebo_wk0   | 50,755 | 44,674 | 36,380 | 43,572 | 28,944 | 21,113 |
| T32  | Placebo_wk0   | 51,269 | 45,264 | 35,945 | 44,203 | 29,421 | 25,287 |
| T7   | Placebo_wk0   | 49,515 | 43,448 | 39,286 | 41,766 | 28,621 | 22,257 |
| T8   | Placebo_wk0   | 50,352 | 44,213 | 38,377 | 42,717 | 29,393 | 24,710 |
| T34  | Placebo_wk0   | 51,560 | 45,590 | 35,626 | 41,131 | 27,345 | 22,183 |
| T23  | Placebo_wk0   | 50,605 | 44,957 | 38,335 | 43,607 | 28,506 | 21,192 |
| T35  | Placebo_wk0   | 52,473 | 45,478 | 39,591 | 43,365 | 28,743 | 24,179 |
| T25  | Placebo_wk0   | 53,556 | 46,649 | 37,899 | 43,934 | 27,642 | 19,982 |
| T26  | Placebo_wk0   | 46,039 | 40,997 | 37,434 | 40,291 | 32,104 | 30,260 |
| T38  | Placebo_wk0   | 47,743 | 41,764 | 34,749 | 40,551 | 26,923 | 22,822 |
| TA15 | Placebo_wk24  | 48,962 | 40,385 | 33,028 | 38,390 | 18,979 | 12,845 |
| TA2  | Placebo_wk24  | 52,187 | 42,716 | 33,787 | 40,092 | 23,470 | 21,082 |
| TA16 | Placebo_wk24  | 51,850 | 42,071 | 33,628 | 39,335 | 21,771 | 18,779 |

|      |              |        |        |        |        |        |        |
|------|--------------|--------|--------|--------|--------|--------|--------|
| TA3  | Placebo_wk24 | 54,564 | 44,875 | 32,210 | 40,071 | 20,767 | 18,274 |
| TA4  | Placebo_wk24 | 53,323 | 41,366 | 33,513 | 39,547 | 20,866 | 17,313 |
| TA18 | Placebo_wk24 | 49,169 | 40,319 | 32,412 | 37,824 | 20,231 | 15,774 |
| TA30 | Placebo_wk24 | 48,958 | 40,019 | 32,429 | 36,480 | 18,899 | 13,295 |
| TA5  | Placebo_wk24 | 55,246 | 44,384 | 33,788 | 40,959 | 20,368 | 16,342 |
| TA31 | Placebo_wk24 | 46,827 | 38,129 | 29,907 | 35,745 | 18,345 | 13,876 |
| TA20 | Placebo_wk24 | 47,230 | 38,451 | 30,306 | 36,245 | 17,575 | 13,599 |
| TA32 | Placebo_wk24 | 50,671 | 41,244 | 32,789 | 38,851 | 18,512 | 14,959 |
| TA7  | Placebo_wk24 | 51,866 | 42,566 | 35,024 | 40,279 | 21,946 | 18,086 |
| TA8  | Placebo_wk24 | 54,884 | 45,026 | 34,944 | 42,269 | 20,874 | 16,672 |
| TA34 | Placebo_wk24 | 53,383 | 44,202 | 31,798 | 37,583 | 18,733 | 15,524 |
| TA23 | Placebo_wk24 | 49,364 | 40,762 | 32,648 | 38,437 | 21,431 | 17,378 |
| TA35 | Placebo_wk24 | 51,741 | 40,764 | 31,805 | 38,136 | 19,705 | 17,296 |
| TA25 | Placebo_wk24 | 41,323 | 34,449 | 27,908 | 32,675 | 16,966 | 13,880 |
| TA26 | Placebo_wk24 | 49,498 | 40,138 | 29,368 | 35,487 | 20,022 | 17,959 |
| TA38 | Placebo_wk24 | 50,755 | 41,405 | 31,612 | 38,838 | 18,672 | 15,995 |

Data as shown in average; wk0, week 0; wk24, week 24

**Table S3** Post and pre-treatment changes ( $\Delta$ ) of relative abundance at family level in the oligonol and placebo groups

| Top 20 at family level      | $\Delta$ Oligonol |       | $\Delta$ Placebo |       | <i>p</i> -Value |
|-----------------------------|-------------------|-------|------------------|-------|-----------------|
|                             | Mean              | SD    | Mean             | SD    |                 |
| f_Lachnospiraceae           | -0.057            | 0.061 | -0.051           | 0.059 | 0.942           |
| f_Bacteroidaceae            | 0.037             | 0.073 | 0.047            | 0.062 | 0.204           |
| f_Ruminococcaceae           | -0.007            | 0.039 | -0.039           | 0.051 | 0.034 *         |
| f_Prevotellaceae            | 0.009             | 0.098 | 0.021            | 0.1   | 0.350           |
| f_Bifidobacteriaceae        | -0.004            | 0.043 | 0.007            | 0.028 | 0.204           |
| f_Oscillospiraceae          | 0.005             | 0.016 | -0.004           | 0.023 | 0.274           |
| f_Enterobacteriaceae        | 0.011             | 0.029 | 0.01             | 0.046 | 0.672           |
| f_Acidaminococcaceae        | 0.001             | 0.013 | -0.003           | 0.02  | 0.589           |
| f_Selenomonadaceae          | -0.005            | 0.039 | 0.001            | 0.023 | 0.915           |
| f_Coriobacteriaceae         | -0.009            | 0.011 | -0.006           | 0.023 | 0.988           |
| f_Fusobacteriaceae          | 0.006             | 0.025 | 0.011            | 0.025 | 0.115           |
| f_Sutterellaceae            | 0.004             | 0.009 | 0.003            | 0.012 | 0.737           |
| f_Erysipelatoclostridiaceae | -0.008            | 0.014 | 0.006            | 0.021 | 0.024 *         |
| f_Veillonellaceae           | 0.007             | 0.016 | 0.005            | 0.021 | 0.236           |
| f_Rikenellaceae             | 0.004             | 0.015 | 0                | 0.013 | 0.630           |
| f_Tannerellaceae            | 0.004             | 0.007 | 0                | 0.011 | 0.261           |
| f_Erysipelotrichaceae       | 0.001             | 0.015 | -0.003           | 0.011 | 0.184           |
| f_Streptococcaceae          | -0.002            | 0.013 | 0.005            | 0.028 | 0.559           |
| f_Peptostreptococcaceae     | -0.004            | 0.009 | 0.001            | 0.014 | 0.274           |
| f_Succinivibrionaceae       | 0.003             | 0.012 | 0.005            | 0.016 | 0.408           |

$\Delta$ , Changes in the relative abundance of the gut microbiota between post- and pre-treatment. \*  $p < 0.05$ .

**Table S4** Patients with percent MRI-PDFF decreased  $\geq 10\%$  at week 24

| Sample ID | Group                                        | BCoAT_wk0 | BCoAT_wk24 |
|-----------|----------------------------------------------|-----------|------------|
| T31       | %MRI-PDFF decreased ( $\geq 10\%$ )_Placebo  | 0.001     | 0.010      |
| T34       | %MRI-PDFF decreased ( $\geq 10\%$ )_Placebo  | 0.010     | 0.016      |
| T35       | %MRI-PDFF decreased ( $\geq 10\%$ )_Placebo  | 0.023     | 0.007      |
| T3        | %MRI-PDFF decreased ( $\geq 10\%$ )_Placebo  | 0.035     | 0.021      |
| T4        | %MRI-PDFF decreased ( $\geq 10\%$ )_Placebo  | 0.003     | 0.017      |
| T7        | %MRI-PDFF decreased ( $> 10\%$ )_Placebo     | 0.021     | 0.010      |
| T2        | %MRI-PDFF decreased ( $\geq 10\%$ )_Placebo  | 0.004     | 0.007      |
| T18       | %MRI-PDFF decreased ( $\geq 10\%$ )_Placebo  | 0.037     | 0.004      |
| T16       | %MRI-PDFF decreased ( $\geq 10\%$ )_Placebo  | 0.016     | 0.001      |
| T15       | %MRI-PDFF decreased ( $\geq 10\%$ )_Placebo  | 0.011     | 0.017      |
| T39       | %MRI-PDFF decreased ( $\geq 10\%$ )_Oligonol | 0.004     | 0.016      |
| T6        | %MRI-PDFF decreased ( $\geq 10\%$ )_Oligonol | 0.016     | 0.055      |
| T24       | %MRI-PDFF decreased ( $\geq 10\%$ )_Oligonol | 0.022     | 0.081      |
| T33       | %MRI-PDFF decreased ( $\geq 10\%$ )_Oligonol | 0.016     | 0.018      |
| T21       | %MRI-PDFF decreased ( $\geq 10\%$ )_Oligonol | 0.007     | 0.072      |
| T28       | %MRI-PDFF decreased ( $\geq 10\%$ )_Oligonol | 0.028     | 0.005      |
| T40       | %MRI-PDFF decreased ( $\geq 10\%$ )_Oligonol | 0.035     | 0.015      |
| T9        | %MRI-PDFF decreased ( $\geq 10\%$ )_Oligonol | 0.024     | 0.020      |
| T22       | %MRI-PDFF decreased ( $\geq 10\%$ )_Oligonol | 0.017     | 0.019      |
| T11       | %MRI-PDFF decreased ( $\geq 10\%$ )_Oligonol | 0.025     | 0.021      |
| T13       | %MRI-PDFF decreased ( $\geq 10\%$ )_Oligonol | 0.004     | 0.007      |

MRI-PDFF, Magnetic Resonance Imaging Proton Density Fat Fraction; BCoAT, Butyryl-CoA: Acetate CoA-Transferase; wk0, week 0; wk24, week 24
