# Supplementary material for: Litchi-Derived Polyphenol Alleviates Liver Steatosis and Gut Dysbiosis in Patients with Non-Alcoholic Fatty Liver Disease: A Randomized Double-Blinded, Placebo-Controlled Study
Source: MDPI journal article supplement (doi:10.3390/nu14142921), 2022-07-16
Supplement: s1 [file s1]

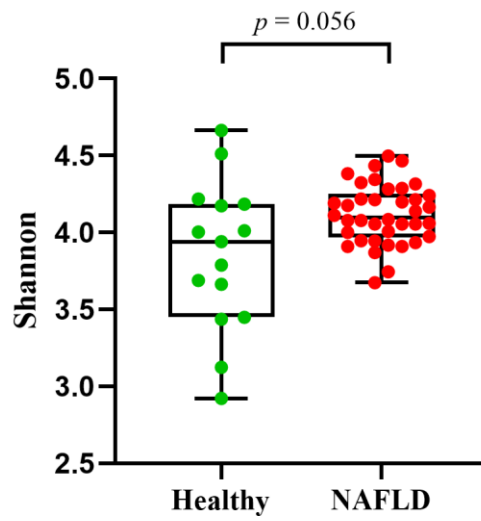

**Figure S1.** Baseline Shannon's diversity in patients with NAFLD and healthy controls.

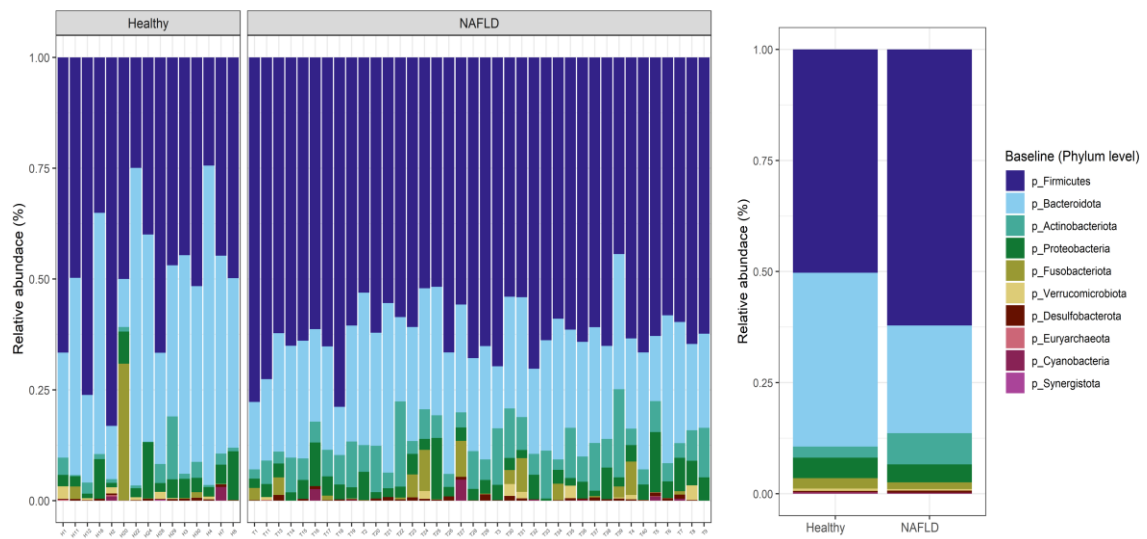

**Figure S2.** Relative abundance at phylum level in patients with NAFLD and healthy controls.

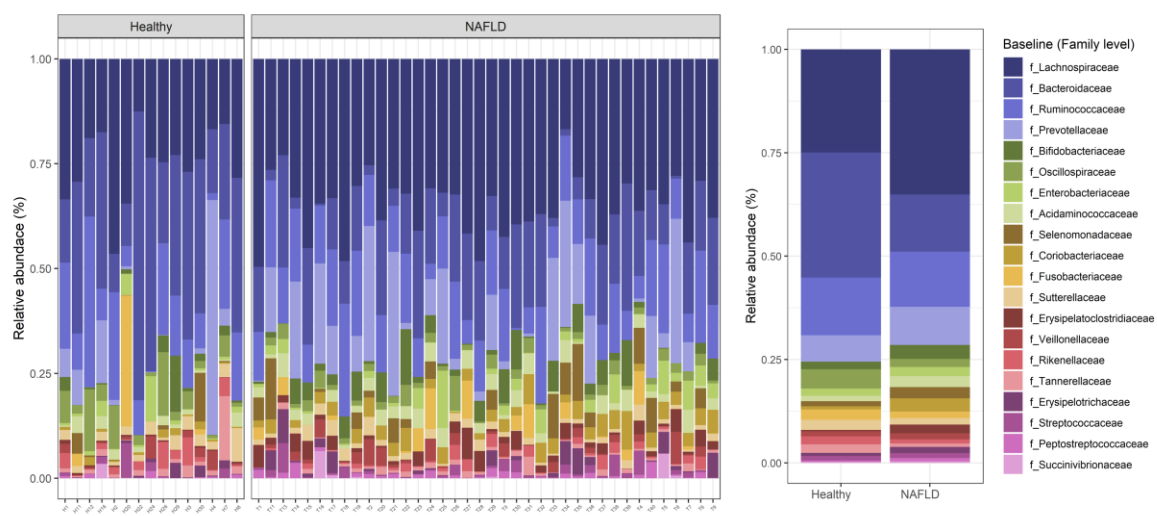

**Figure S3.** Relative abundance of top 20 families in patients with NAFLD and healthy controls.
